# Supplementary material for: In vivo functional analysis of a nuclear restorer PPR protein
Source: PubMed Central journal article supplement (PMC4240901; doi:10.1186/s12870-014-0313-4), 2014-11-18
Supplement: 12870_2014_313_MOESM2_ESM.pdf [file 12870_2014_313_MOESM2_ESM.pdf]

## SUPPLEMENTARY TABLES

Table S1. Segregation of male fertility sterility in the T1 progeny of wtRfo and Rfo $\Delta$  transgenic plants

| Cross                                 | Pollen Production |    |
|---------------------------------------|-------------------|----|
|                                       | Yes               | No |
| Rfo $\Delta$ -3 x Westar (maintainer) | 20                | 0  |
| Rfo $\Delta$ -10 x Westar             | 20                | 0  |
| Rfo $\Delta$ -15 x Westar             | 20                | 0  |
| Rfo $\Delta$ -22 x Westar             | 12                | 8  |
| wtRfo x wtRfo                         | 5                 | 1  |

Table S2. Primers used for building genetic constructs.

| Primer designation | Sequence, 5' to 3'                                                 | Construct number | Sequence: Location*                     |
|--------------------|--------------------------------------------------------------------|------------------|-----------------------------------------|
| Sal1PF             | <b>GAGAGTCGACGATTATTAAGATTTAATATAAATA</b>                          | 1                | Rfo: -1479 to -1456                     |
| BRg26Eco           | <b>CTCTGAATCTGGAAGGTGTCCTCTTTAGTTC</b>                             | 1, 5, 6, 7, 8    | Rfo: +2468 to +2443                     |
| Pf                 | <b>GAGAGGGCCCGTCGACGATTATTAAGATTTAATATAAATA</b>                    | 2                | Rfo: -1479 to -1456                     |
| Pr                 | <b>CTCTCTCGAGTTTATTTTTGTTTCGCCCTAAATTTTG</b>                       | 2                | Rfo: -1 to -26                          |
| Fg26Xhostart       | <b>CTCTCTCGAGATGTTGGCTAGGGTTTGTGG</b>                              | 3, 6, 7, 8       | Rfo: +1 to +20                          |
| Bforwardg26        | <b>GCCTTGGATTTTTTTCATCAAATGTGTAGGCCCAATGTCGTAACCTTC</b>            | 3                | Rfo: +502 to +526**<br>+539 to +561     |
| reverseg26         | <b>GAAGGTTACGACATTGGGCCTACACATTTGATGAAAAAATCCAAGGC</b>             | 3                | Rfo: +561 to +539**<br>+526 to +502     |
| DFg24Xhostart      | <b>CTCTCTCGAGATGTTGGCTAGGGTTTGCAGATTCG</b>                         | 4, 5             | PPR-A: +1 to +25                        |
| DRg24              | <b>GAACGTTAGGACATCTGGTCTACATGTCGTTTCAAAAATTGATGAAACAAATCCAAGGC</b> | 4                | PPR-A: +555 to +508                     |
| EFg24              | <b>GCCTTGGATTTGTTTCATCAAATTTTGAACGACATGTAGACCAGATGTCCTAACGTTTC</b> | 4                | PPR-A: +508 to + 555                    |
| Rg24Ecostop        | <b>CTCTGAATTCGAGTGCAGCTTTCTTTTTTTAAAC</b>                          | 4                | PPR-A: +2456 to +2432                   |
| g24swapA           | <b>GTCAGCATATTGCGGATAGTAAT</b>                                     | 5                | PPR-A: +1970 to +1948                   |
| g2624FswapB        | <b>ATTACCATCCGCAATATGCTGAC</b>                                     | 5                | PPR-A: +1948 to +1970                   |
| P3g24g26Reverse    | <b>ACCCTCGCGCAAAGACC</b>                                           | 6                | Rfo: +594 to + 577                      |
| P3g2426swapF       | <b>GGTCTTTGCCGCGAGGGT</b>                                          | 6                | Rfo: +577 to +594                       |
| g26RUTRA           | <b>GAAGAAAATCTTTGATCATTCAGGTATCAGGATACACCAC</b>                    | 7                | Rfo: +2210 to +2189**<br>+1953 to +1939 |
| g26FUTRB           | <b>TGAATGATCAAAGATTTTCTTC</b>                                      | 7                | Rfo: +2189 to +2210                     |
| Apa1Sal1F02        | <b>GAGAGGGCCCGTCGACGCCAAATACAACCCGAACCTAATGG</b>                   | 8                | PPR-A: -1125 to -1102                   |
| g24RXho1F03        | <b>CTCTCTCGAGACTCGAATCTGCAAACCCCTAGCCAACAT</b>                     | 8                | PPR-A +22 - +1                          |

\*Location relative to the initiation codon in either *Rfo* or *PPR-A*. Sequences designated as extending from a smaller to a larger nucleotide number prime extension in the direction of the 3' UTR; sequences designated as extending from a larger to a smaller nucleotide number prime in the direction of the promoter.

\*\*Primers corresponding to two distinct but nearby sequences were used in the generation of deletion mutations (constructs 3 and 7)
