# Supplementary material for: In vivo functional analysis of a nuclear restorer PPR protein
Source: PubMed Central journal article supplement (PMC4240901; doi:10.1186/s12870-014-0313-4), 2014-11-18

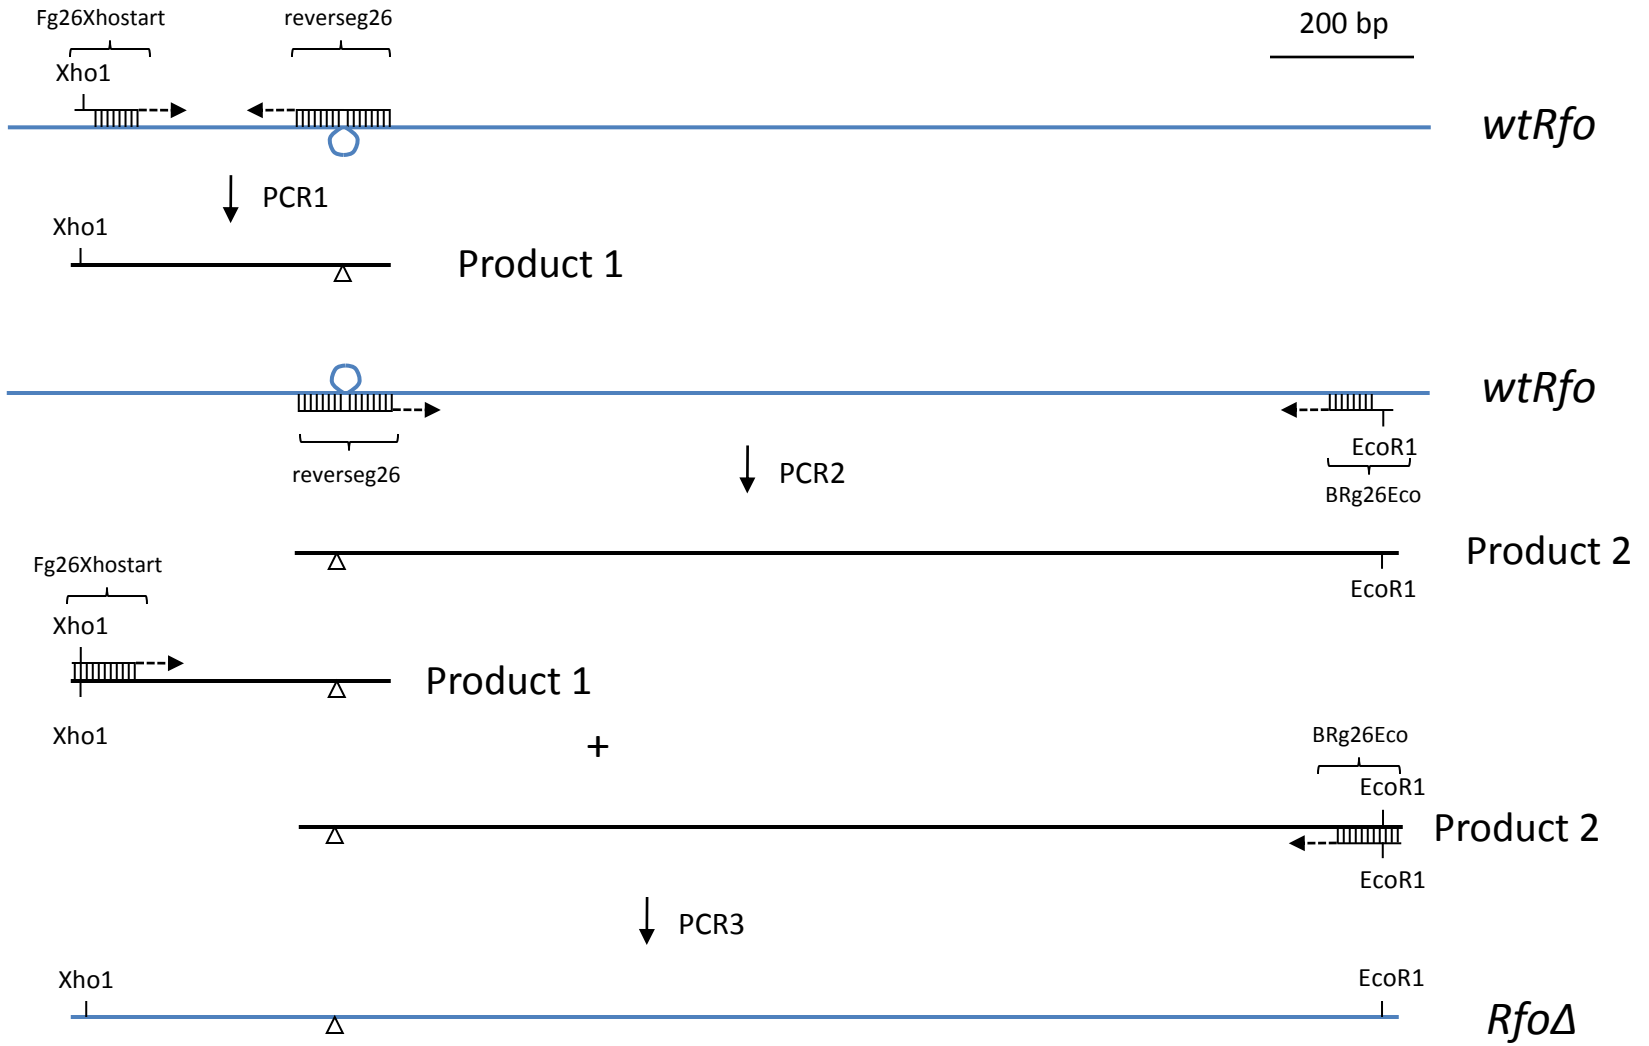

Supplement: 12870_2014_313_MOESM4_ESM.pdf [file 12870_2014_313_MOESM4_ESM.pdf]
